# Supplementary material
Source: HighWire-hosted journal article supplement (https://sti.bmj.com/content/99/4/239)
Supplement: inline-supplementary-material-2 [file inline-supplementary-material-2.pdf]

## Women

Included participants in concordance analysis:

- 1,492 women

Included participants in risk factor analysis:

- 1,149 women with at least genital HPV infection

Number of detected genital infection records in risk factor analysis:

- 2,677 type-specific infection records:
  - 1,622 genital-only
  - 1,055 concurrent
